# Supplementary material for: Methanol conversion on ZSM-22, ZSM-35 and ZSM-5 zeolites: effects of 10-membered ring zeolite structures on methylcyclopentenyl cations and dual cycle mechanism
Source: Royal Society of Chemistry journal article supplement (doi:10.1039/c6ra08884h), 2016-01-01
Supplement: c6ra08884h1.pdf [file c6ra08884h1.pdf]

## Supporting Information

*for*

### Methanol Conversion on ZSM-22, ZSM-35 and ZSM-5 zeolites: Effects of 10-membered Ring Zeolite Structures on Methylcyclopentenyl Cations and Dual Cycle Mechanism

Contents

**Scheme S1.** MCP<sup>+</sup> cations and their deprotonated forms, methylcyclopentadienes.

**Fig. S1.** XRD patterns of ZSM-22, ZSM-35 and ZSM-5.

**Fig. S2.** SEM images of ZSM-22, ZSM-35 and ZSM-5.

**Fig. S3.** <sup>29</sup>Si MAS NMR spectra of ZSM-22, ZSM-35 and ZSM-5.

**Fig. S4.** <sup>27</sup>Al MAS NMR spectra of ZSM-22, ZSM-35 and ZSM-5.

**Fig. S5.** N<sub>2</sub> adsorption and desorption isotherms of ZSM-22, ZSM-35 and ZSM-5.

**Fig. S6.** <sup>1</sup>H MAS NMR spectra of ZSM-22, ZSM-35 and ZSM-5.

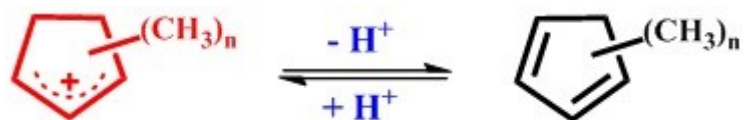

**Scheme S1.** MCP<sup>+</sup> cations and their deprotonated forms, methylcyclopentadienes.

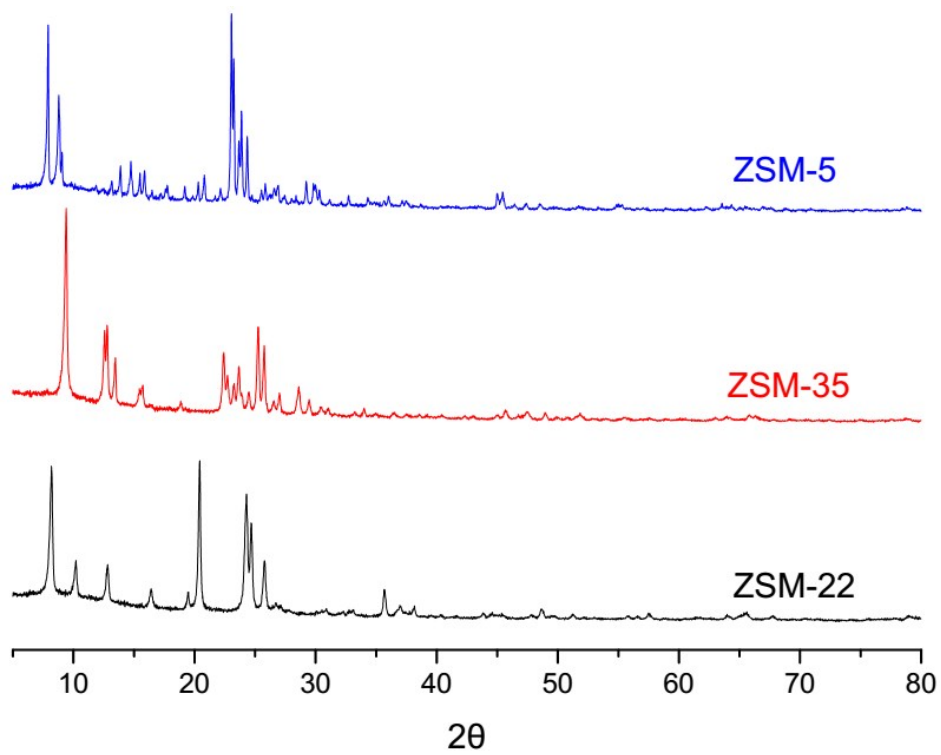

**Fig. S1** XRD patterns of ZSM-22, ZSM-35 and ZSM-5

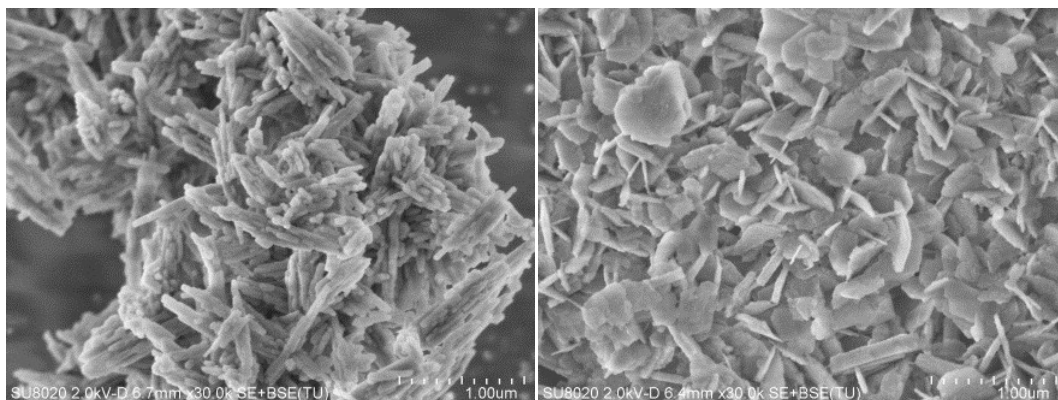

ZSM-22

ZSM-35

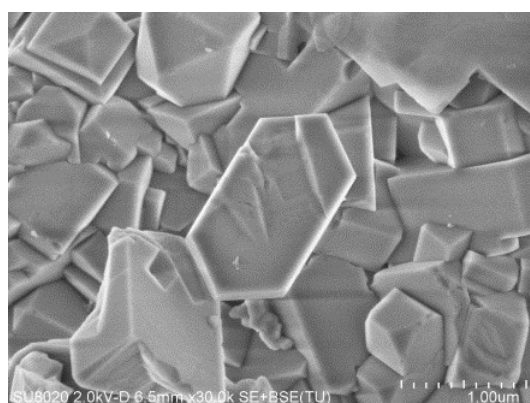

ZSM-5

**Fig. S2** SEM images of ZSM-22, ZSM-35 and ZSM-5

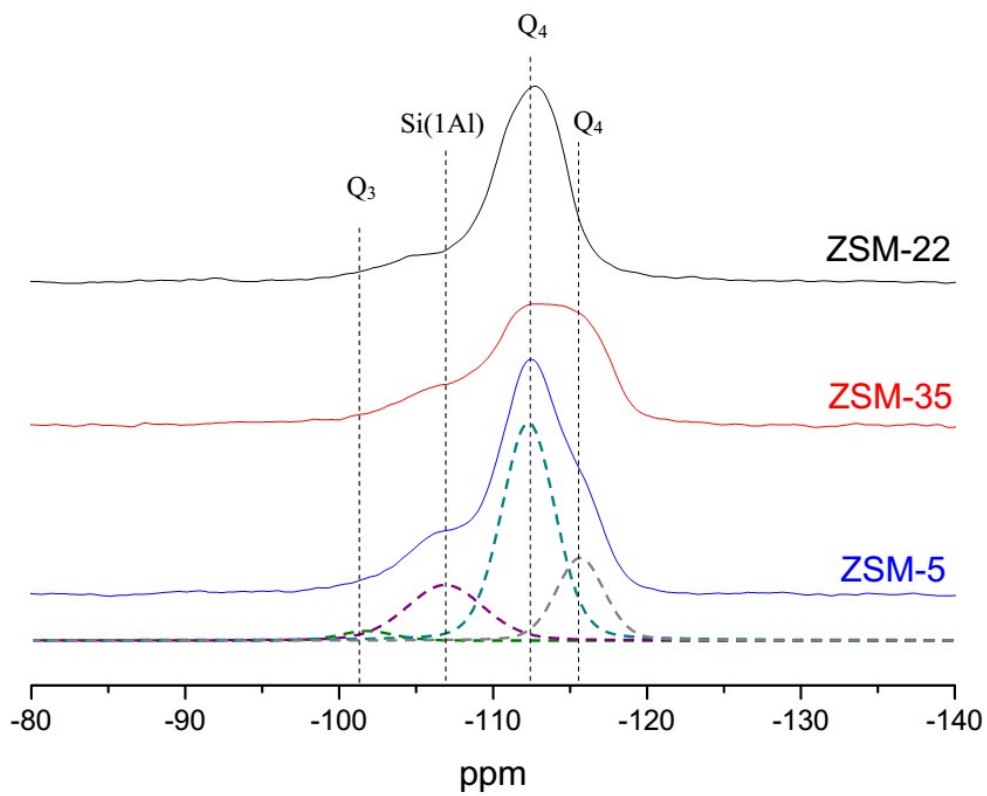

**Fig. S3**  $^{29}\text{Si}$  MAS NMR spectra of ZSM-22, ZSM-35 and ZSM-5

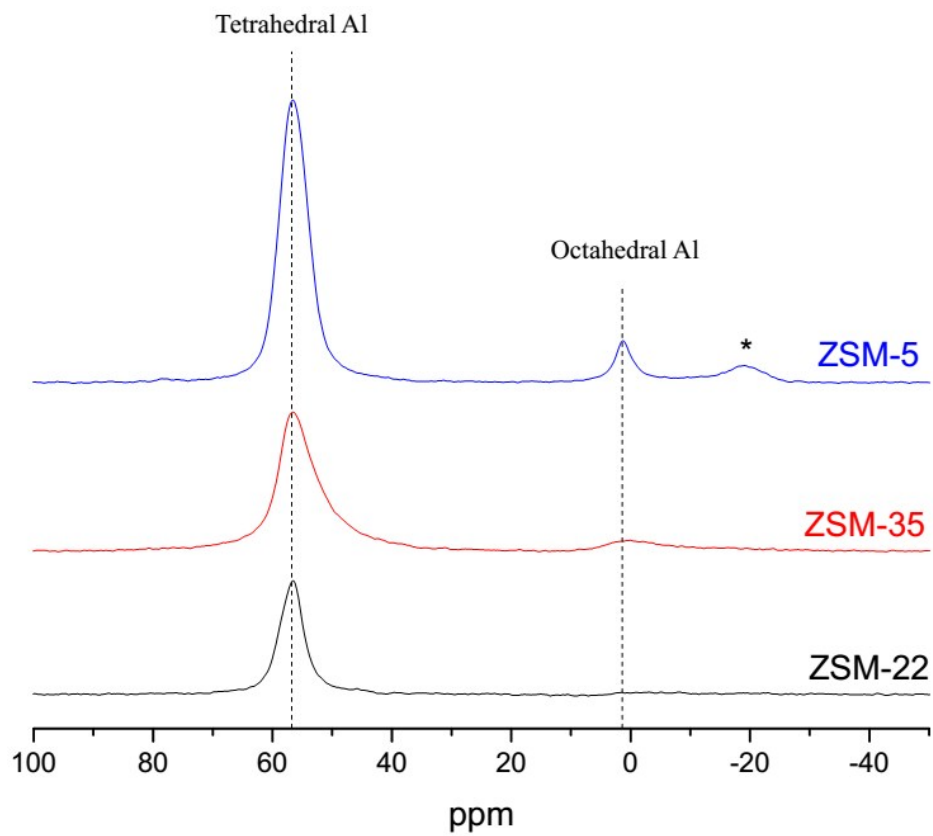

**Fig. S4**  $^{27}\text{Al}$  MAS NMR spectra of ZSM-22, ZSM-35 and ZSM-5

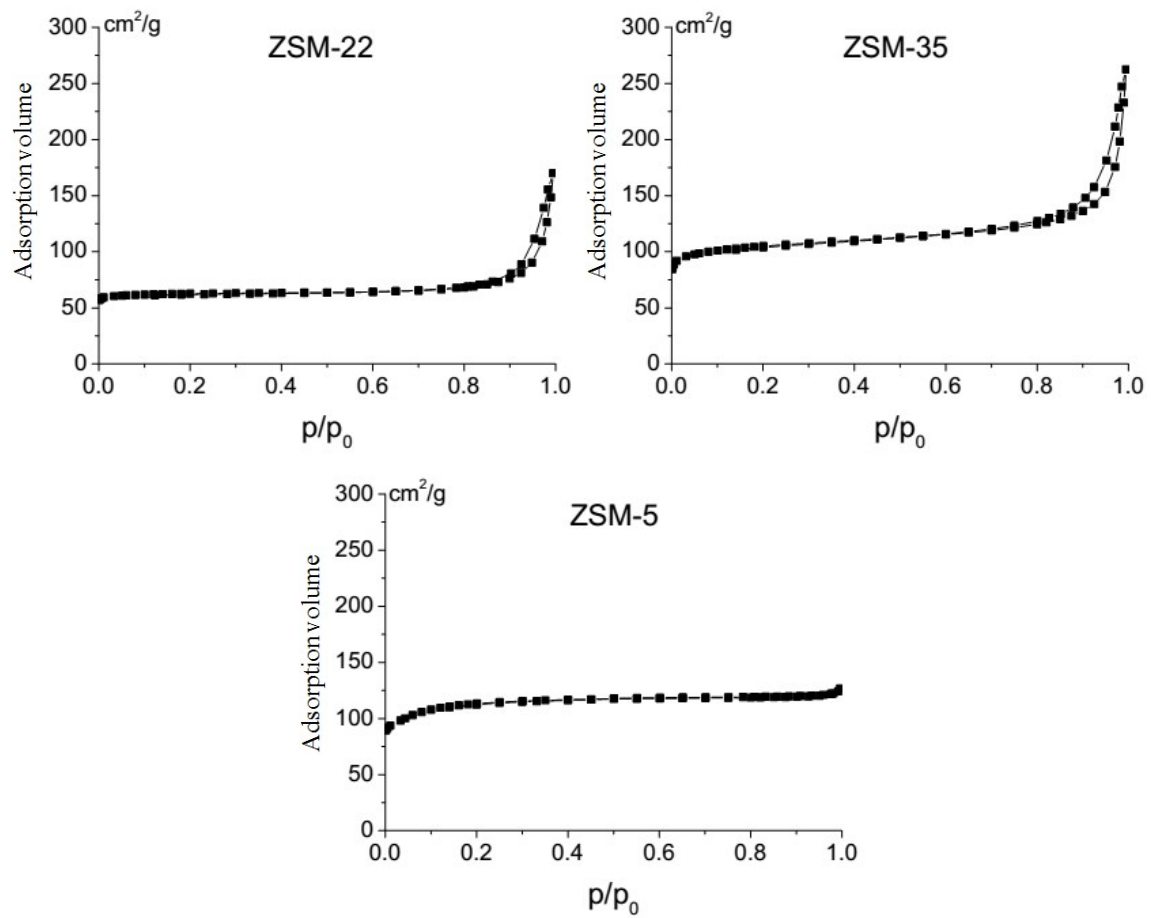

Fig. S5  $\text{N}_2$  adsorption and desorption isotherms of ZSM-22, ZSM-35 and ZSM-5

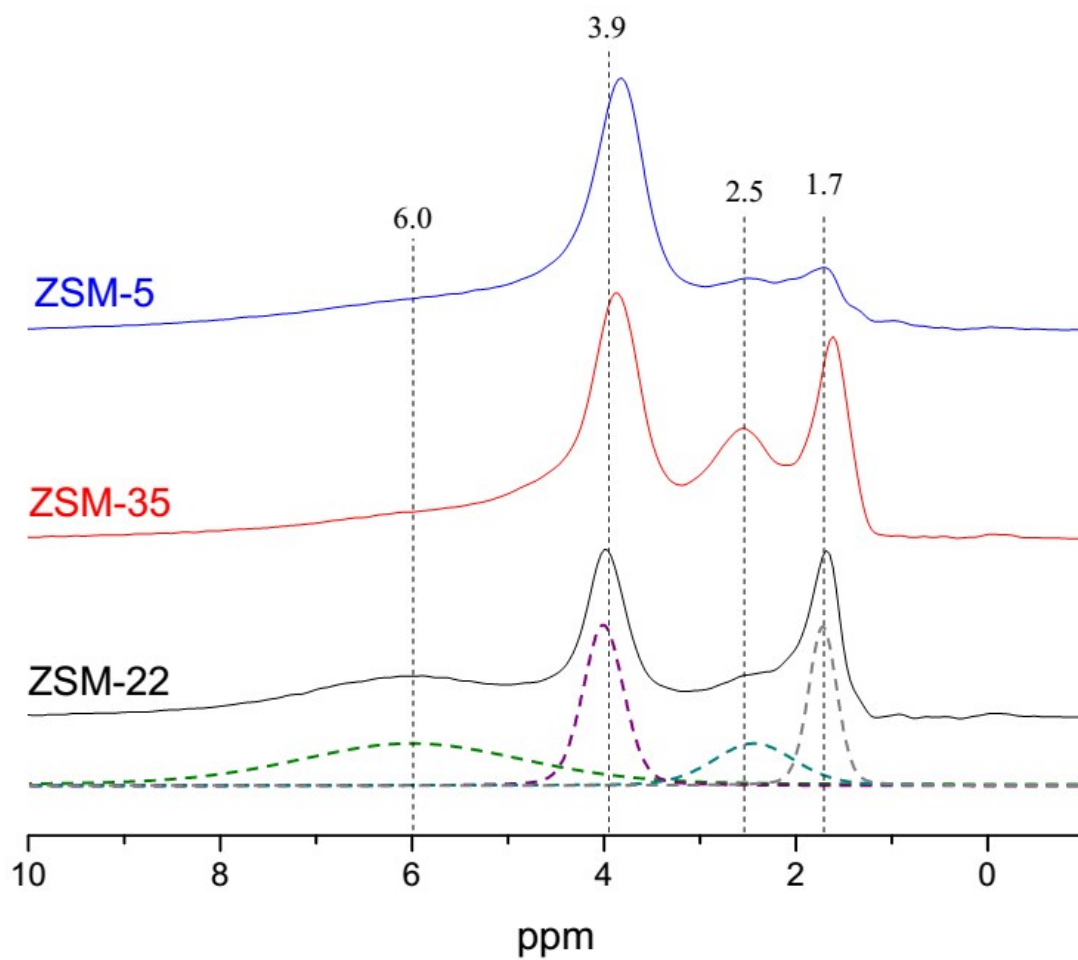

**Fig. S6**  $^1\text{H}$  MAS NMR spectra of ZSM-22, ZSM-35 and ZSM-5
